# Supplementary material for: Genetic Mapping of Flavonoid Grain Pigments in Durum Wheat
Source: MDPI journal article supplement (doi:10.3390/plants12081674), 2023-04-17
Supplement: s1 [file s1]

Supplemental Figures

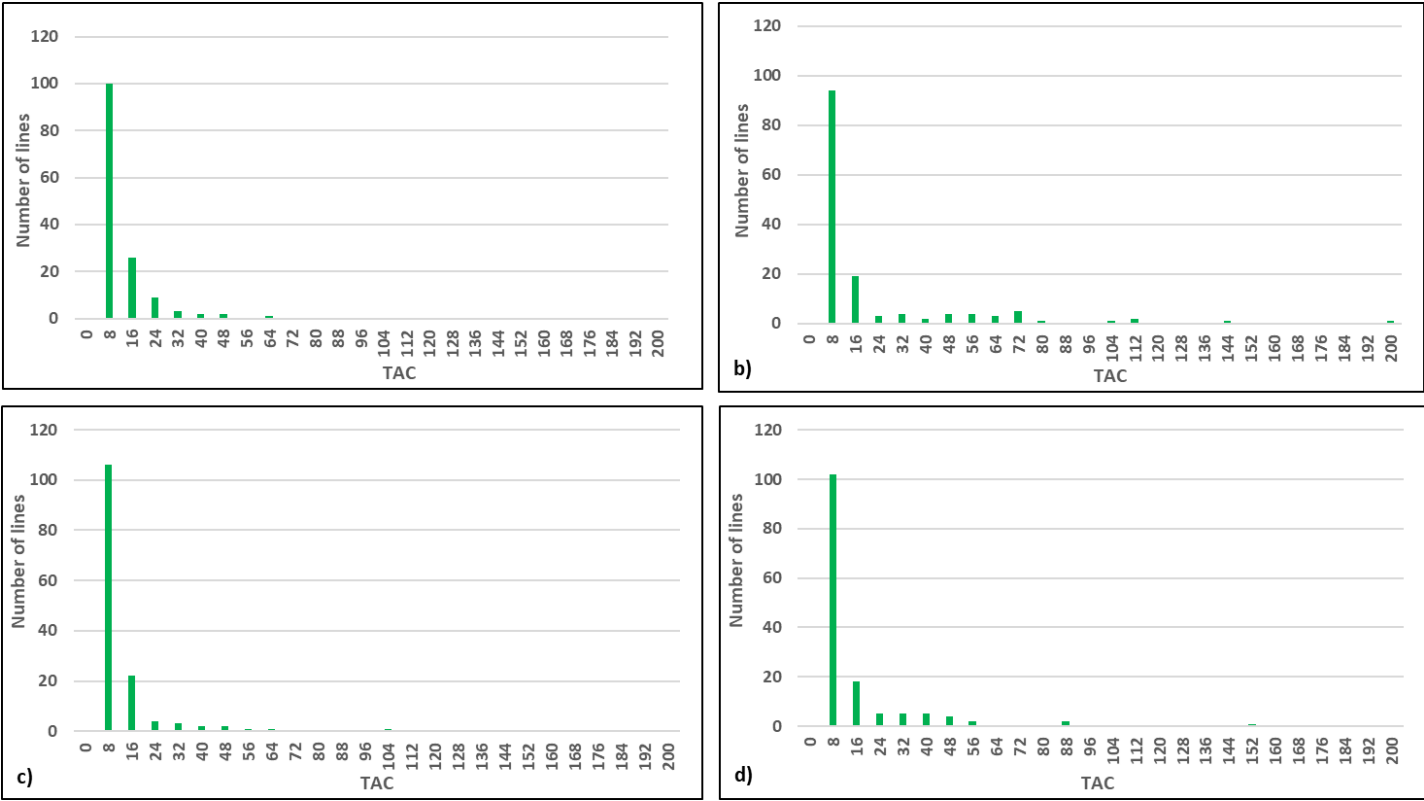

**Figure S1.** Frequency distributions of total anthocyanin compounds (TAC) in four field trials carried out at Valenzano 2020 (a), Valenzano 2021 (b), Bari 2021 (c), Valenzano 2022 (d).





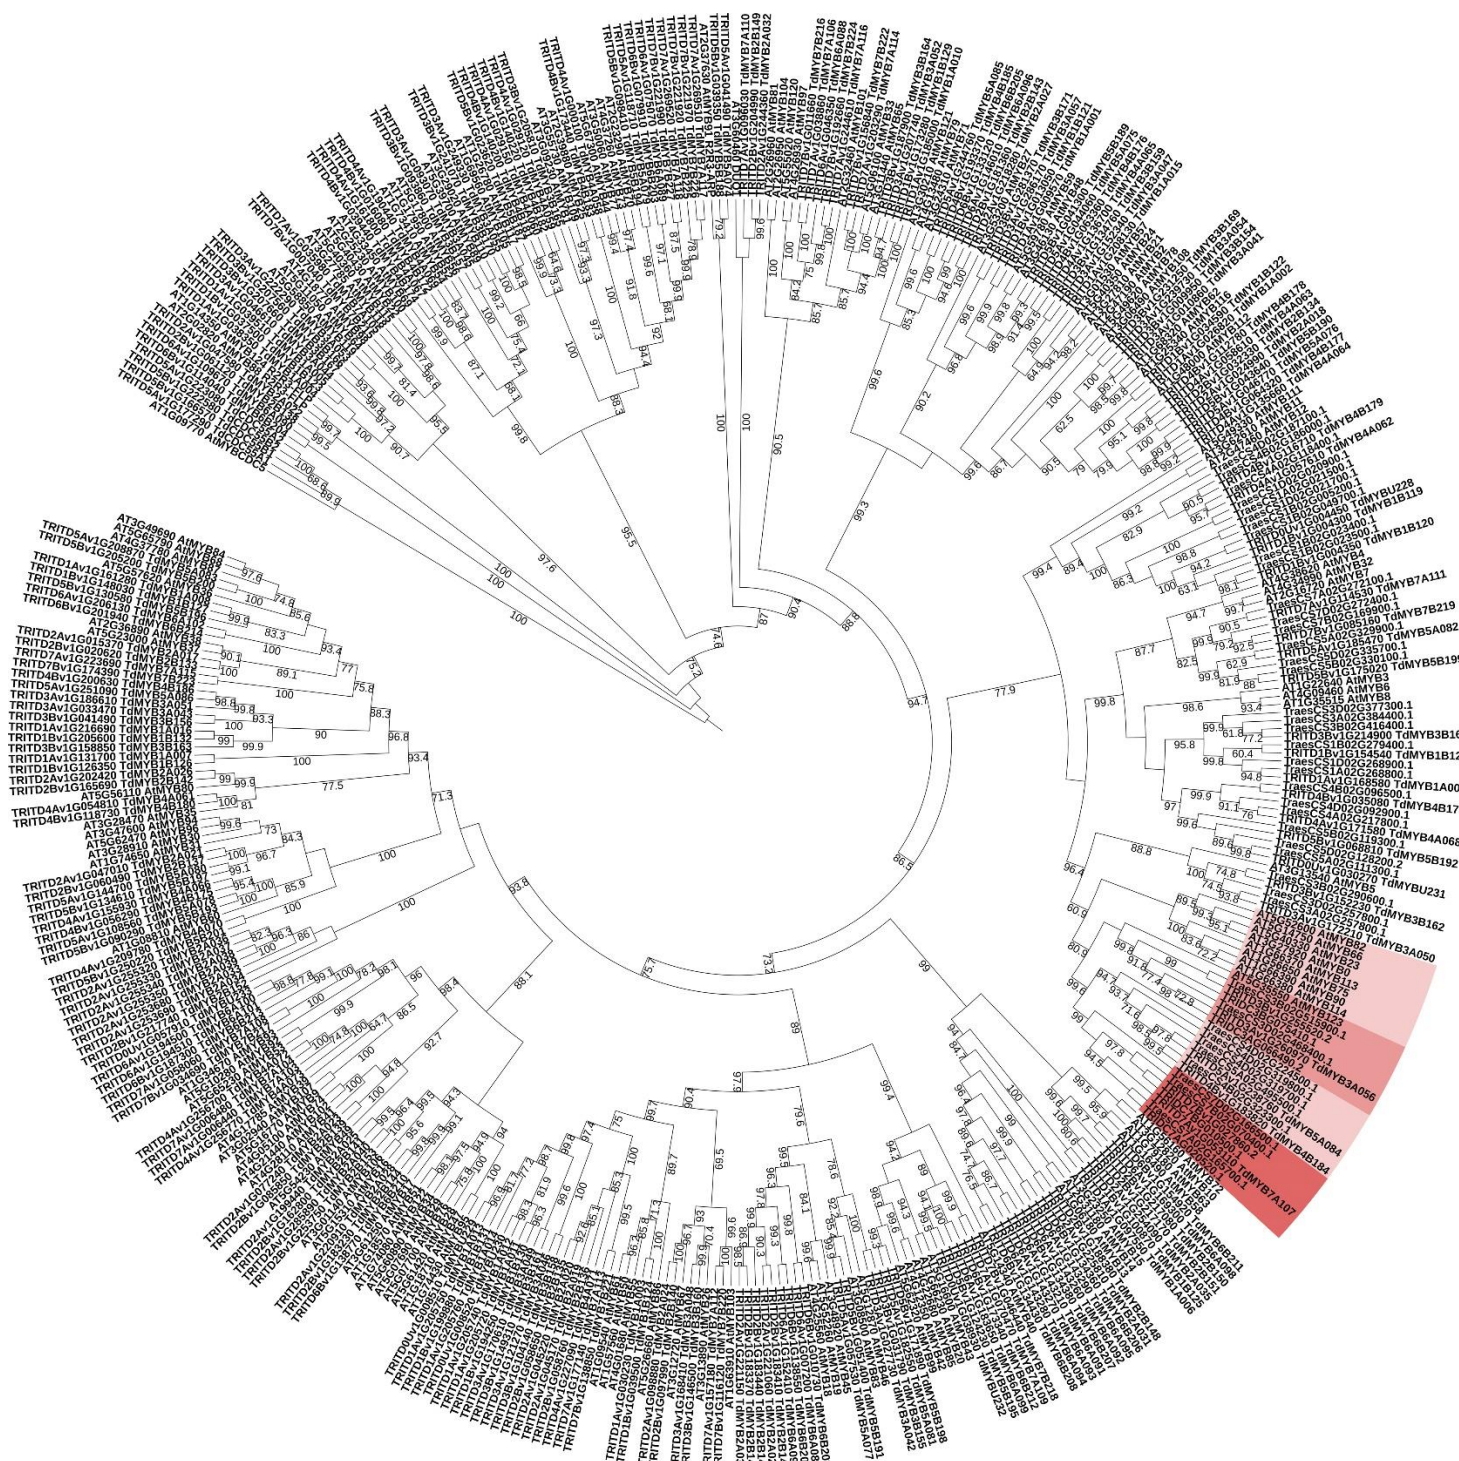

**Figure S3.** Phylogenetic analysis of R2R3-MYB proteins from wheat and *Arabidopsis thaliana*. Maximum Likelihood tree including durum wheat (TRITD), their wild emmer orthologs (TRIDC), bread wheat (TraesCS) proteins putatively involved in the regulation of phenylpropanoid biosynthesis, and *A. thaliana* AtMYBs. Brown: group with the putative MYB genes identified in this study. The tree is rooted with AtCDC5 protein. Numbers on the branch nodes indicate bootstrap values (only bootstraps > 60 are shown).

|                |                                                                  |
|----------------|------------------------------------------------------------------|
| Norin61        | GGCCAAGCCGCCGCCGCCGCCGCCGAGGCCGGCGGCGAGGCGCACGCCCTGCCCAGGGGCACGA |
| Chinese Spring | GGCCAAGCCGCCG-----GCGGCGAGGCGCACGCCCTGCCCAGGGGCACGA              |
| Svevo          | GGCCAAGCCGCCG-----GCGGCGAGGCGCACGCCCTGCCCAGGGGCACGA              |
| Zavitan        | GGCCAAGCCGCCG-----CCGCAGGCCGGCGGCGAGGCGCACGCCCTGCCCAGGGGCACGA    |
|                | *****                                                            |

**Figure S4.** Alignment of *Tamyb10-B1* gene sequences from the red-grain bread wheat cv. Norin 61 [43], bread wheat Chinese Spring, wild emmer Zavitan, and durum wheat Svevo.
