# Supplementary material for: Genetic Mapping of Flavonoid Grain Pigments in Durum Wheat
Source: Plants (Basel). 2023 Apr 17;12(8):1674. doi: 10.3390/plants12081674 (PMC10142998; doi:10.3390/plants12081674)
Supplement: Supplementary file 1 [file plants-12-01674-s001.zip › plants-2312778-supplementary Tables S1-S5.xlsx]

## Sheet: Table S1 
Table S1. Analysis of variance of five traits evaluated in the RIL population PG2 x Grecale in four environments.
Trait	Environment	Error	Block	Genotype	Error	Block	Genotype			h2
		DF	DF	DF	MS	MS	MS	F-value	Pr>F	(by mean)
TAC	VAL_2021	280	2	143	28.9139	69.9106	2162.89	74.8045	0	0.91
TAC	VAL_2022	280	2	143	66.0135	568.496	928.058	14.0586	0	0.81
Grain color	VAL_2020	255	2	143	0.1274	0.1651	1.7699	13.8917	0	0.928
Grain color	VAL_2021	276	2	143	0.0712	0.6401	2.3039	32.3457	0	0.9691
Grain color	BARI_2021	274	2	140	0.1055	0.2171	2.1377	20.272	0	0.9507
Grain color	VAL_2022	281	2	142	0.1006	0.1012	2.0435	20.3208	0	0.9508
L*	VAL_2020	254	2	142	1.0348	25.6085	8.5454	8.2579	0	0.8789
L*	VAL_2021	276	2	143	0.4665	5.4977	13.3415	28.5984	0	0.965
L*	BARI_2021	271	2	140	2.5335	88.8508	12.3256	4.8651	0	0.7945
L*	VAL_2022	264	2	140	0.4051	8.6775	10.5352	26.0034	0	0.9615
a*	VAL_2020	253	2	142	0.0984	1.7792	0.5053	5.1348	0	0.8053
a*	VAL_2021	278	2	143	0.0756	0.557	0.9616	12.7259	0	0.9214
a*	BARI_2021	274	2	140	0.0958	6.589	0.7078	7.3884	0	0.8647
a*	VAL_2022	266	2	140	0.0666	3.4475	0.7103	10.6695	0	0.9063
b*	VAL_2020	254	2	142	0.3242	12.0805	4.3126	13.3021	0	0.9248
b*	VAL_2021	278	2	143	0.4356	4.2001	8.7534	20.0943	0	0.9502
b*	BARI_2021	274	2	140	0.3941	1.5763	7.5599	19.1814	0	0.9479
b*	VAL_2022	266	2	140	0.2605	6.3759	6.8185	26.177	0	0.9618
TAC, Total Anthocyanin Content; L*, a*, b*, Colour values.
DF, Degree of Freedom; MS, Mean square; G, Genotype; E, Environment; h2, Broad-sense heritability.

## Sheet: Table S2 
Table S2. Analysis of variance of five traits evaluated in the RIL population PG2 x Grecale across four environments.
Trait	Error	Block	Genotype	Environments	GbyE	Error	Block	Genotype			Environments			GbyE			h2
Trait	DF	DF	DF	DF	DF	MS	MS	MS	F-value	Pr>F	MS	F-value	Pr>F	MS	F-value	Pr>F	(by mean)
TAC	560	4	143	1	143	47.4637	319.729	2859.13	60.2382	0	6149.38	129.56	5.007e-06	231.788	4.8835	0	0.94
Grain color	1086	8	143	3	425	0.1006	0.281	7.5956	75.4708	0	2.4865	24.706	2.092e-05	0.202	2.0068	0	0.9738
L*	1065	8	143	3	422	1.1128	32.2054	39.883	35.8402	0	425.336	382.22	0	1.4733	1.3239	0.0002109	0.9634
a*	1071	8	143	3	422	0.0839	3.088	2.3964	28.5619	0	8.2864	98.763	0	0.1546	1.8423	0	0.9373
b*	1072	8	143	3	422	0.3552	6.0686	25.1189	70.7263	0	69.0523	194.428	0	0.6781	1.9093	0	0.9733
TAC, Total Anthocyanin Content; L*, a*, b*, Colour values.
DF, Degree of Freedom; MS, Mean square; G, Genotype; E, Environment; h2, Broad-sense heritability.

## Sheet: Table S3
Table S3. Pairwise correlation coefficients among environments for L*, a*, b* color values, total anthocyanin compounds (TAC) (Pearson correlation coefficients), and grain color (Sperman rank correlation coefficients) in the recombinant inbred lines population PG2 x Grecale.
Trait	Environment	VAL_2020	VAL_2021	BARI_2021	VAL_2022
TAC	VAL_2020	1.00**
TAC	VAL_2021	0.91**	1.00**
TAC	BARI_2021	0.91**	0.92**	1.00**
TAC	VAL_2022	0.90**	0.95**	0.93**	1.00**
Grain color	VAL_2020	1.00**
Grain color	VAL_2021	0.85**	1.00**
Grain color	BARI_2021	0.84**	0.88**	1.00**
Grain color	VAL_2022	0.82**	0.85**	0.86**	1.00**
L*	VAL_2020	1.00**
L*	VAL_2021	0.88**	1.00**
L*	BARI_2021	0.82**	0.87***	1.00**
L*	VAL_2022	0.81**	0.94**	0.87***	1.00**
a*	VAL_2020	1.00**
a*	VAL_2021	0.75**	1.00**
a*	BARI_2021	0.75**	0.84**	1.00**
a*	VAL_2022	0.72**	0.87**	0.79**	1.00**
b*	VAL_2020	1.00**
b*	VAL_2021	0.91**	1.00**
b*	BARI_2021	0.91**	0.93**	1.00**
b*	VAL_2022	0.88**	0.93**	0.92**	1.00**
** Significant at p < 0.01

## Sheet: Table S4 
Table S4. Simple correlation coefficients among L*, a*, b* color values, total anthocyanin compounds (TAC) (Pearson correlation coefficients), grain color (Sperman rank correlation coefficients) in individual environments and across environments in the recombinant inbred lines population PG2 x Grecale grown at four environments.
Environment	Trait	L*	a*	b*	Grain color	TAC
VAL_2020	L*	1.00**
	a*	-0.74**	1.00**
	b*	0.74**	-0.62**	1.00**
	Grain color	-0.72**	0.55**	-0.67**	1.00**
	TAC	-0.68**	0.31**	-0.67**	0.54**	1.00**
VAL_2021	L*	1.00**
	a*	-0.87**	1.00**
	b*	0.77**	-0.79**	1.00**
	Grain color	-0.78**	0.77**	-0.62**	1.00**
	TAC	-0.78**	0.58**	-0.76**	0.59**	1.00**
BARI_2021	L*	1.00**
	a*	-0.77'**	1.00**
	b*	0.62**	-0.64**	1.00**
	Grain color	-0.74**	0.66**	-0.64**	1.00**
	TAC	-0.60**	0.44**	-0.57**	0.62**	1.00**
VAL_2022	L*	1.00**
	a*	-0.81**	1.00**
	b*	0.73**	-0.75**	1.00**
	Grain color	-0.77**	0.71**	-0.60**	1.00**
	TAC	-0.69**	0.45**	-0.69**	0.66**	1.00**
Across Environments	L*	1.00**
	a*	-0.85**	1.00**
	b*	0.77**	-0.76**	1.00**
	Grain color	-0.87**	0.72**	-0.72**	1.00**
	TAC	-0.73**	0.47**	-0.72**	0.63**	1.00**
**: significant at 0.01P.

## Sheet: Table S5
Table S5. Number and distribution of SNP markers in the PG2 x Grecale map.
Chromosome/ Linkage group	Number of SNPs	Chromosome length (cM)	Number of SNPs/cM
1A	400	167.3	2.39091
1B	477	170.8	2.79274
2A	321	198	1.62121
2B_1	20	14.5	1.37931
2B_2	584	220.1	2.65334
3A_1	110	66.3	1.65913
3A_2	188	122	1.54098
3B	569	217.2	2.61971
4A	292	207.9	1.40452
4B	265	160.1	1.65522
5A	497	218.9	2.27044
5B_1	47	24.3	1.93416
5B_2	448	154.6	2.8978
6A	373	160.3	2.32689
6B	490	170.3	2.87728
7A	419	240.2	1.74438
7B	334	177.6	1.88063
Genome A	2600	1380.9	1.88283
Genome B	3234	1309.5	2.46964
Genomes AB	5834	2690.4	2.16845
